# Supplementary material for: Establishment of the Volatile Signature of Wine-Based Aromatic Vinegars Subjected to Maceration
Source: PubMed Central journal article supplement (PMC6017499; doi:10.3390/molecules23020499), 2018-02-23
Supplement: molecules-23-00499-s001.pdf [file molecules-23-00499-s001.pdf]

**SUPPLEMENTARY MATERIAL:**

## **Establishment of the global volatile signature of wine-based aromatic vinegars subjected to maceration**

**Rosa Perestrelo <sup>1</sup>, Catarina L. Silva <sup>1</sup>, Pedro Silva <sup>1</sup>, José S. Câmara <sup>1,2,\*</sup>**

<sup>1</sup> CQM – Centro de Química da Madeira, Universidade da Madeira, Campus da Penteada, 9020-105 Funchal, Portugal ([rmp@uma.pt](mailto:rmp@uma.pt); [cgluis@uma.pt](mailto:cgluis@uma.pt); [pedro\\_dasilva@hotmail.com](mailto:pedro_dasilva@hotmail.com))

<sup>2</sup> Departamento de Química, Faculdade de Ciências Exatas e Engenharia, Universidade da Madeira, Campus da Penteada, 9020-105 Funchal, Portugal ([jsc@uma.pt](mailto:jsc@uma.pt))

\* Correspondence: [jsc@uma.pt](mailto:jsc@uma.pt); Tel.: +351 291705112

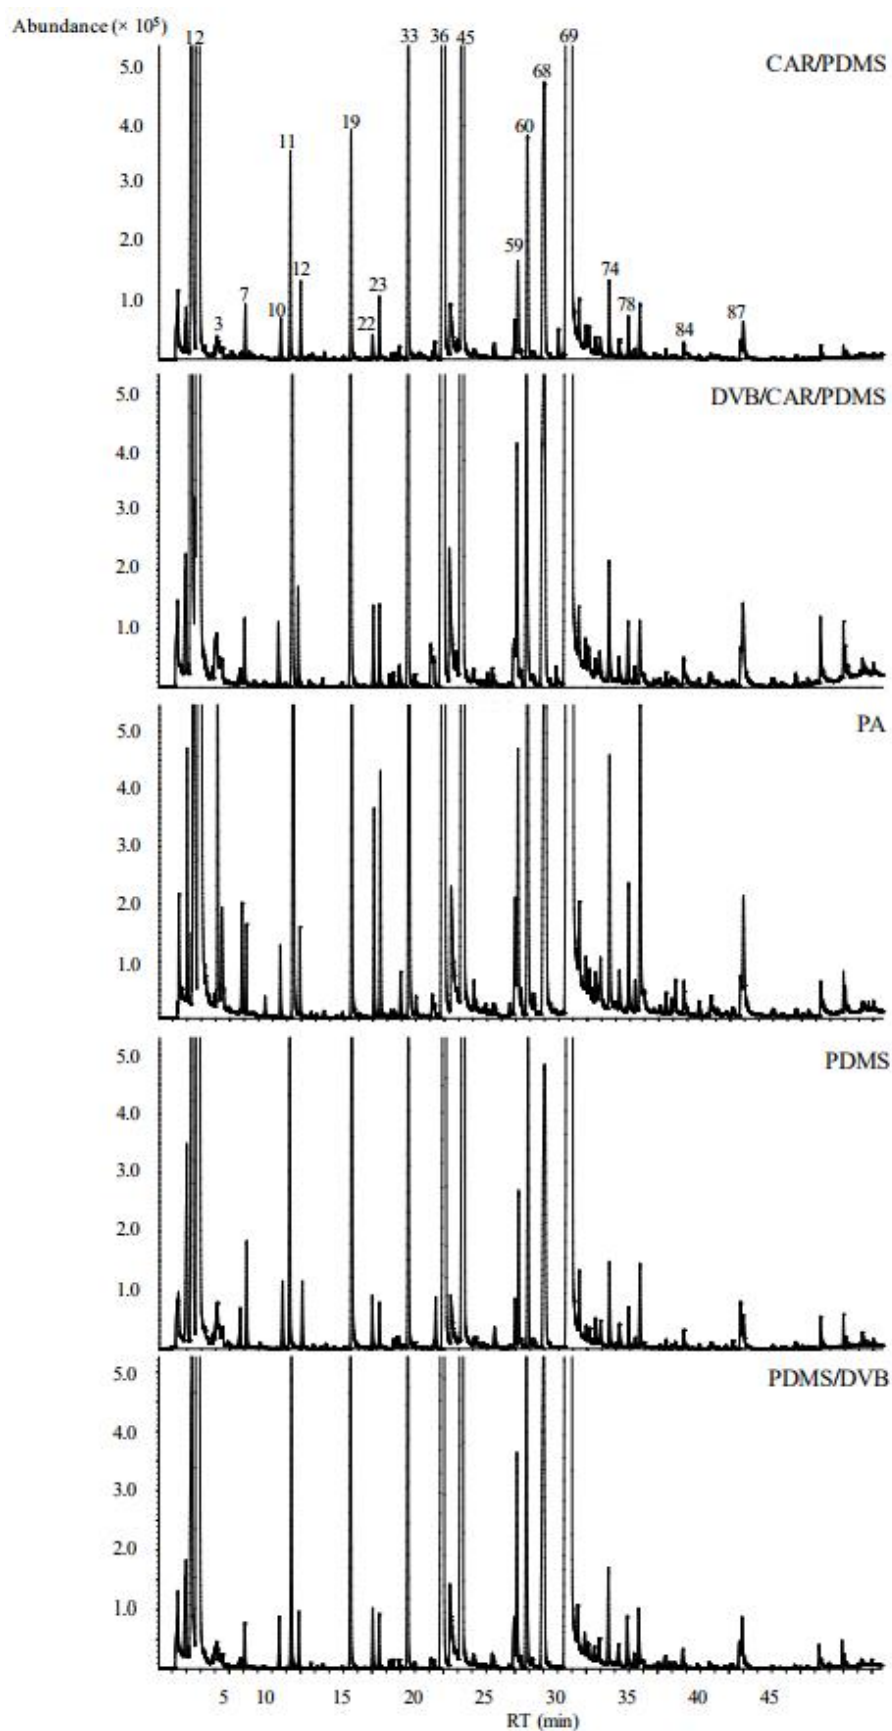

**Figure S1.** Total ion chromatograms obtained by HS-SPME/GC-MS analysis of wine vinegar (control) using different SPME fibers for 15 min at 40 °C under constant magnetic stirring (700 rpm). Attribution of the peak number shown in Table 1.
